# Supplementary material for: Avian Influenza A (H7N9) and related Internet search query data in China
Source: Springer Nature journal article supplement (doi:10.1038/s41598-019-46898-y), 2019-07-18
Supplement: 41598_2019_46898_MOESM1_ESM.pdf [file 41598_2019_46898_MOESM1_ESM.pdf]

# Supplementary materials

## Avian Influenza A (H7N9) and related Internet search query data in China

Ying Chen<sup>1, 2</sup>, Yuzhou Zhang<sup>2</sup>, Zhiwei Xu<sup>2</sup>, Xuanzhuo Wang<sup>1</sup>, Jiahai Lu<sup>1\*</sup>, Wenbiao Hu<sup>2\*</sup>

Correspondence: Jiahai Lu (E-mail: [lujiahai@mail.sysu.edu.cn](mailto:lujiahai@mail.sysu.edu.cn)) or Wenbiao Hu (E-mail: [w2.hu@qut.edu.au](mailto:w2.hu@qut.edu.au)).

<sup>1</sup> School of Public Health, Sun Yat-sen University, Guangzhou, China.

<sup>2</sup> School of Public Health and Social Work, Institute of Health and Biomedical Innovation, Queensland University of Technology, Brisbane, Australia.

**Table S1. Poisson regression model of longitude and latitude with H7N9 cases and BSI from wave 1 to wave 5.**

|          | Longitude    |                |                 |         | Latitude     |                |                 |         |
|----------|--------------|----------------|-----------------|---------|--------------|----------------|-----------------|---------|
|          | Coefficients | Standard error | Wald Chi-square | P value | Coefficients | Standard error | Wald Chi-square | P value |
| Cases_W1 | 0.372        | 0.0545         | 46.591          | <0.001  | 0.076        | 0.0275         | 7.686           | 0.006   |
| Cases_W2 | 0.102        | 0.0188         | 29.238          | <0.001  | -0.023       | 0.0118         | 3.763           | 0.052   |
| Cases_W3 | 0.023        | 0.0122         | 3.599           | 0.058   | -0.036       | 0.0132         | 7.484           | 0.006   |
| Cases_W4 | 0.102        | 0.0394         | 6.745           | 0.009   | -0.046       | 0.0251         | 3.282           | 0.07    |
| Cases_W5 | 0.065        | 0.0079         | 66.823          | <0.001  | -0.032       | 0.0072         | 19.82           | <0.001  |
| BSI_W1   | 0.051        | 0.0017         | 896.453         | <0.001  | -0.009       | 0.0018         | 24.038          | <0.001  |
| BSI_W2   | 0.044        | 0.0018         | 584.187         | <0.001  | -0.025       | 0.002          | 163.515         | <0.001  |
| BSI_W3   | 0.037        | 0.0023         | 258.582         | <0.001  | -0.018       | 0.0026         | 46.191          | <0.001  |
| BSI_W4   | 0.033        | 0.0021         | 247.083         | <0.001  | 0.002        | 0.0025         | 0.746           | 0.388   |
| BSI_W5   | 0.011        | 0.0014         | 69.394          | <0.001  | -0.005       | 0.0018         | 8.602           | 0.003   |

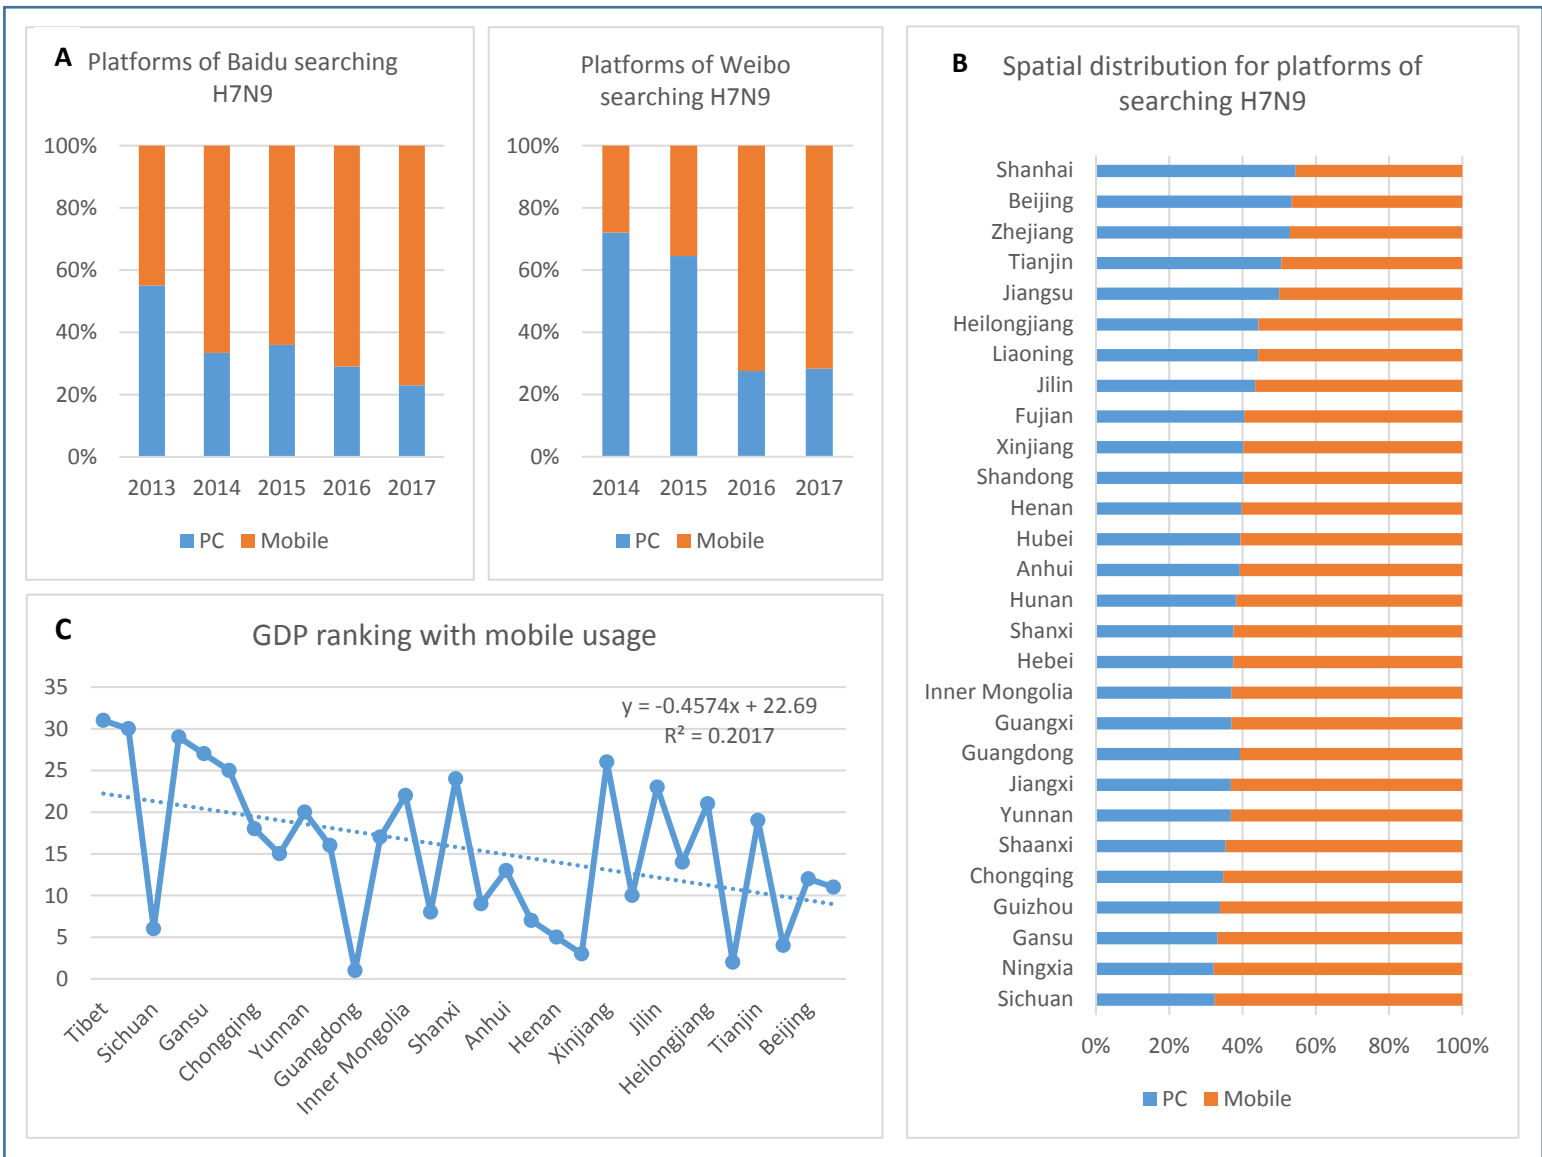

**Figure S1. Using two platform of personal computer (PC) and mobile for H7N9 searching and posting based on Baidu Searching Index (BSI) from 2013-2017.**

A: Time trend of using mobile phones or PC on Weibo and Baidu searching platforms. B: Spatial distribution in whole country for H7N9 searching using PC and mobile. C: The y-axis is the ranking of GDP, and the X-axis is the provinces sorted according to the proportion of mobile phone usage from high to low.

**Table S2. Duration of H7N9 case outbreak start date and peak date with BSI and WPI for H7N9.**

|                   | <b>W1</b>                     | <b>W2</b>   | <b>W3</b>   | <b>W4</b>   | <b>W5</b>   |            |
|-------------------|-------------------------------|-------------|-------------|-------------|-------------|------------|
| <b>H7N9 Cases</b> | Median                        | 3           | 4           | 5.5         | 4.5         | 11         |
|                   | Week count                    | 11          | 33          | 24          | 28          | 46         |
|                   | Outbreak start date           | 8-Apr       | 6-Jan       | 22-Dec      | 11-Jan      | 12-Dec     |
|                   | Outbreak end date             | 6-May       | 21-Apr      | 9-Mar       | 28-Mar      | 15-May     |
|                   | Duration of outbreak in weeks | 5           | 16          | 12          | 14          | 23         |
|                   | Peak date                     | 22-Apr      | 3-Feb       | 2-Feb       | 8-Feb       | 30-Jan     |
|                   | Peak value                    | 39          | 50          | 27          | 10          | 63         |
| <b>BSI</b>        | <b>W1</b>                     | <b>W2</b>   | <b>W3</b>   | <b>W4</b>   | <b>W5</b>   |            |
|                   | Median                        | 3862        | 1850        | 1235        | 978         | 937        |
|                   | Week count                    | 27          | 52          | 52          | 52          | 65         |
|                   | Duration of outbreak in weeks | 11          | 32          | 27          | 19          | 30         |
|                   | Outbreak start date (D)       | 1-Apr (-1)  | 9-Dec (-4)  | 10-Nov (-6) | 21-Dec (-3) | 26-Dec (2) |
|                   | Outbreak end date (D)         | 10-Jun (5)  | 26-May (5)  | 11-May (9)  | 25-Apr (4)  | 17-Jul (9) |
|                   | Peak date (D)                 | 15-Apr (-1) | 27-Jan (-1) | 19-Jan (-2) | 11-Jan (-4) | 27-Feb (4) |
| Peak value        | 287846                        | 27873       | 5810        | 14901       | 42163       |            |
| <b>WPI</b>        | <b>W1</b>                     | <b>W2</b>   | <b>W3</b>   | <b>W4</b>   | <b>W5</b>   |            |
|                   | Median                        | 6634        | 1979        | 337         | 103         | 88         |
|                   | Week count                    | 26          | 52          | 52          | 52          | 65         |
|                   | Outbreak start date (D)       | 8-Apr (0)   | 2-Dec (-5)  | 1-Dec (-3)  | 28-Dec (-2) | 26-Dec (2) |
|                   | Outbreak end date (D)         | 10-Jun (5)  | 24-Mac (1)  | 4-May (8)   | 25-Apr (4)  | 3-Jul (7)  |
|                   | Duration of outbreak in weeks | 10          | 22          | 23          | 18          | 28         |
|                   | Peak date (D)                 | 8-Apr (-2)  | 17-Feb (2)  | 19-Jan (-2) | 18-Apr (10) | 20-Fec (3) |
| Peak value        | 562733                        | 91379       | 8688        | 2126        | 15428       |            |

Note: median indicates number of wave case or index.

D indicates the difference for date between H7N9 cases and BSI, WPI, respectively.

**Table S3. Parameters estimates and their testing results of the SARIMA model (1,0,0)(1,0,0).**

|            | Coefficients | Standard<br>error | t      | P value          | R <sup>2</sup> | BIC   |
|------------|--------------|-------------------|--------|------------------|----------------|-------|
| <b>AR</b>  | 0.855        | 0.032             | 26.447 | <b>&lt;0.001</b> | 0.736          | 3.585 |
| <b>SAR</b> | 0.125        | 0.077             | 1.632  | 0.104            |                |       |
| <b>BSI</b> | 0.008        | 0.002             | 3.553  | <b>&lt;0.001</b> | 0.748          | 3.550 |
| <b>WPI</b> | 0.002        | 0.001             | 2.103  | <b>0.036</b>     | 0.740          | 3.581 |

A

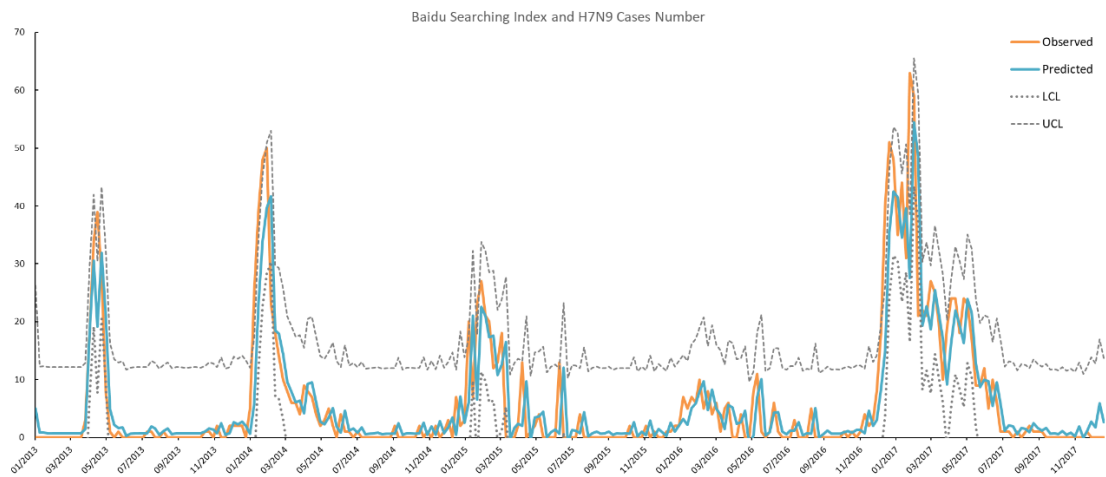

B

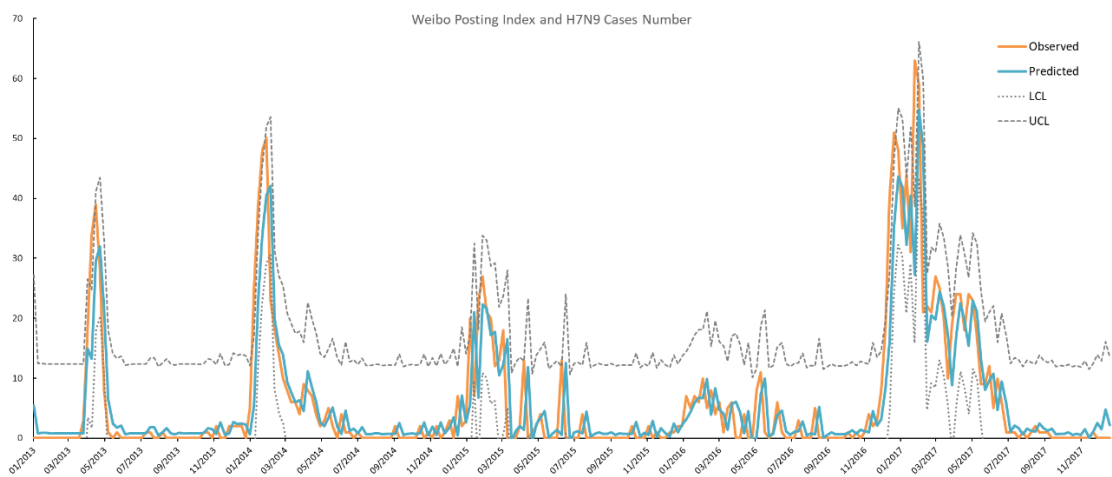

**Figure S2:** (A) Observed and fitted value of the ARIMA model (1, 0, 0) for H7N9 cases with Baidu Searching Index from 2013 to 2017. (B) Observed and fitted value of the ARIMA model (1, 0, 0) for H7N9 cases with Weibo Posting Index from 2013 to 2017. (Y axis: H7N9 cases number, X axis: date, UCL: upper control limit and LCL: lower control limit.)

a. The SARIMA model (1,0,0)(1,0,0) of BSI

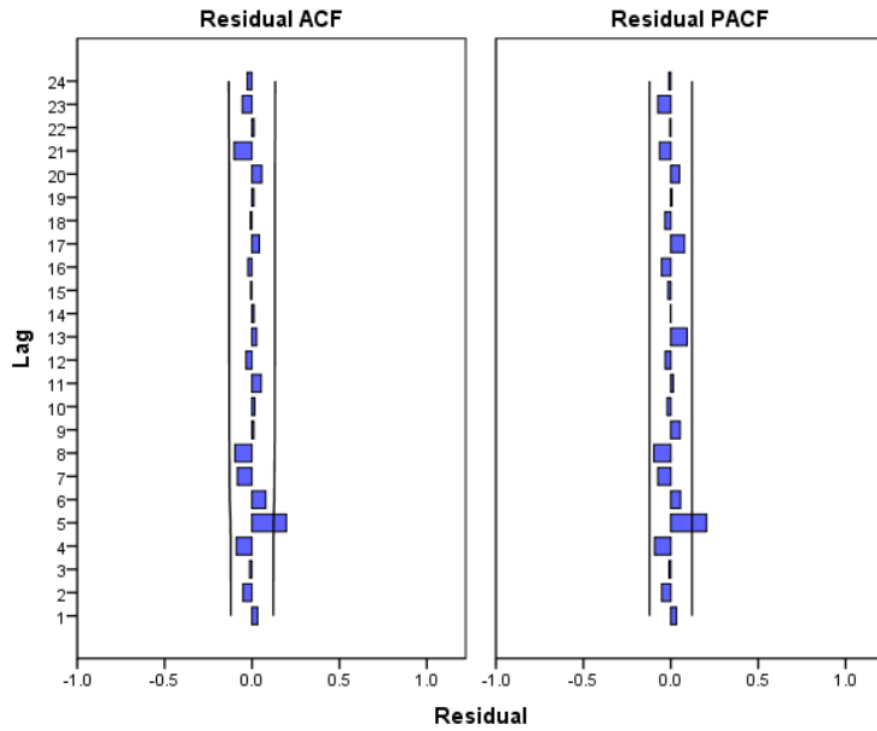

b. The SARIMA model (1,0,0)(1,0,0) of WPI

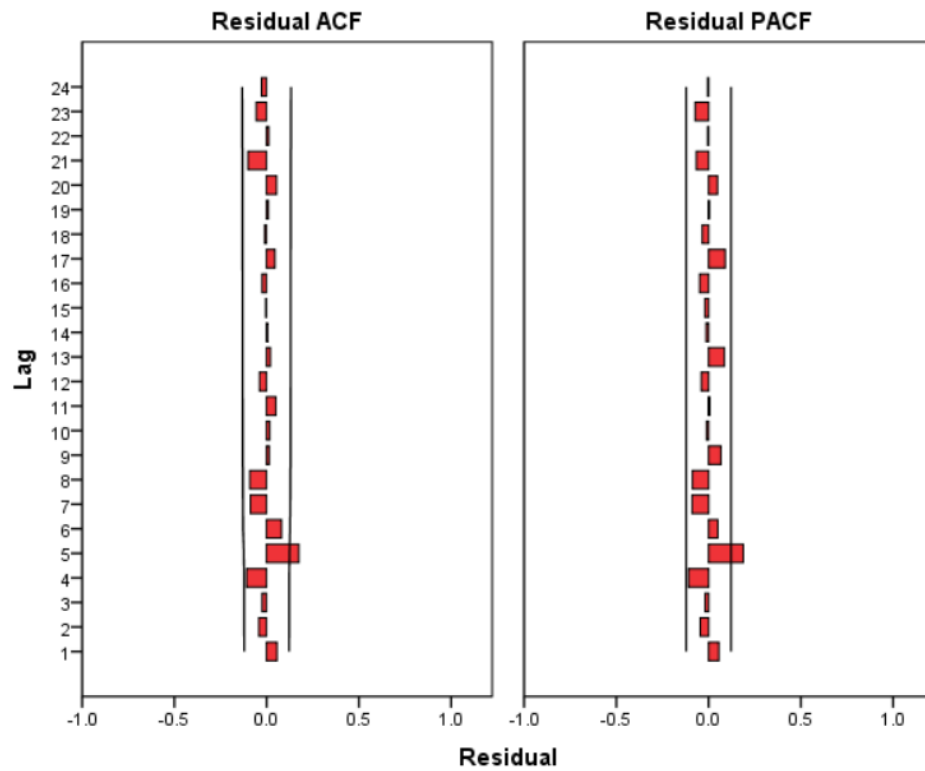

Figure S3. Autocorrelation function (ACF) and partial autocorrelation function (PACF) of the residual series of the SARIMA models
